# Supplementary material for: Dietary serine-microbiota interaction enhances chemotherapeutic toxicity without altering drug conversion
Source: PubMed Central journal article supplement (PMC7244588; doi:10.1038/s41467-020-16220-w), 2020-05-22
Supplement: 41467_2020_16220_MOESM1_ESM.pdf [file 41467_2020_16220_MOESM1_ESM.pdf]

## **Supplementary Information**

### **Dietary serine-microbiota interaction enhances chemotherapeutic toxicity without altering drug conversion**

Ke and Saba, et.al

Supplemental Figure 1

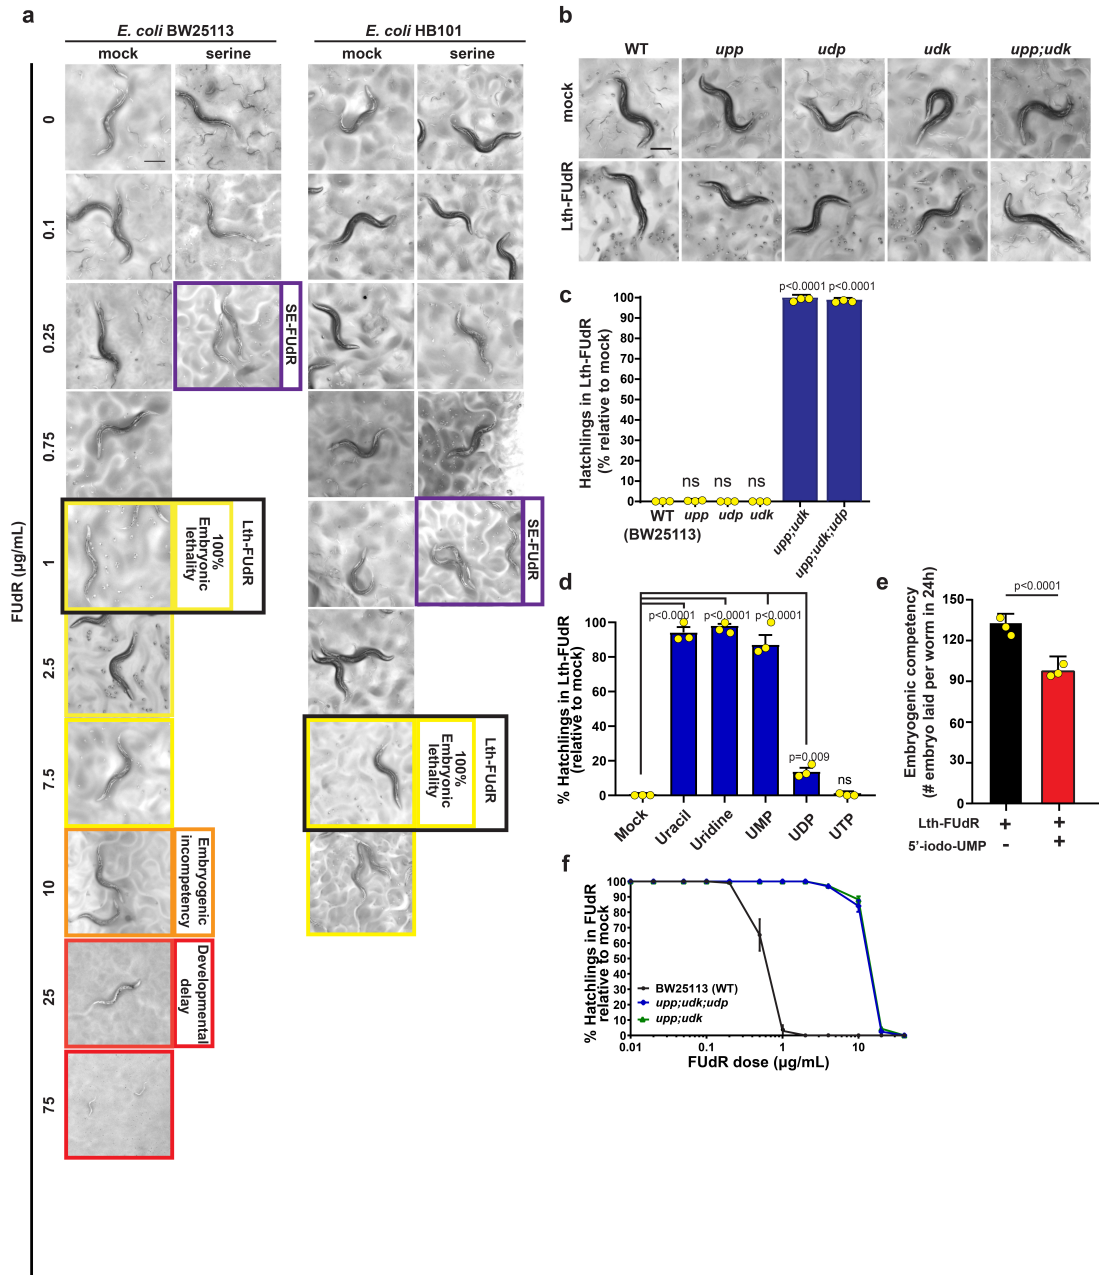

**Supplementary Figure 1. FUdR-to-FUMP conversion in *E. coli* drives Lth-FUdR toxicity in *C. elegans*.**

Throughout this figure: % hatchlings is estimated as [live hatchlings/(live hatchlings + live embryos + dead embryos)] in condition of interest (i.e. Lth-FudR) relative to % hatchlings in mock of the same *E. coli* or *C. elegans* genotype;  $\geq 5$  images of each treatment were quantitated. Statistical significance was assessed via two-tailed unpaired nonparametric t-test for % hatchlings quantification. Data are presented as mean values  $\pm$  SEM, scale bars = 200 $\mu$ m. n= # independent biological replicates. Source data are provided as a Source Data file.

(a) Representative images of the toxic effect of increasing doses of FUdR in the absence or presence of 1.5mg/mL serine on *C. elegans* cultured on *E. coli* BW25113 or HB101. n>10. (b) Representative images of progeny viability of *C. elegans* exposed from L1 to mock or Lth-FUdR (1 $\mu$ g/mL) while cultured on WT *E. coli* (BW25113), or the single mutants *upp*, *udp*, and *udk*, or the double mutant *upp;udk*. The WT and *upp;udk* images are also shown for the same conditions in Fig. 1B. (c) Quantification of percent hatchlings relative to mock of treatments represented in b plus *E. coli* triple mutant *upp;udk;udp*. n=3. (d) Quantification of % hatchlings of *C. elegans* exposed from L1 to Lth-FUdR (1 $\mu$ g/mL) in the presence of the following metabolites: Uracil 2.5mg/mL, Uridine 5mg/mL, UMP 2.5mg/mL, UDP 5mg/mL, or UTP 5mg/mL. n=3. (e) Quantification of total number of embryos (all dead) laid in 24h per worm treated with Lth-FUdR  $\pm$  the Tmk inhibitor 5'-iodo-UMP (100 $\mu$ M). n=3. (f) Quantification of % hatchlings in worms cultured on WT (BW25113), *upp;udk* double KO, or *upp;udk;udp* triple KO lawns and treated with increasing doses of FUdR (0-40  $\mu$ g/mL). FUdR dose is depicted in logarithmic scale.

## Supplemental Figure 2

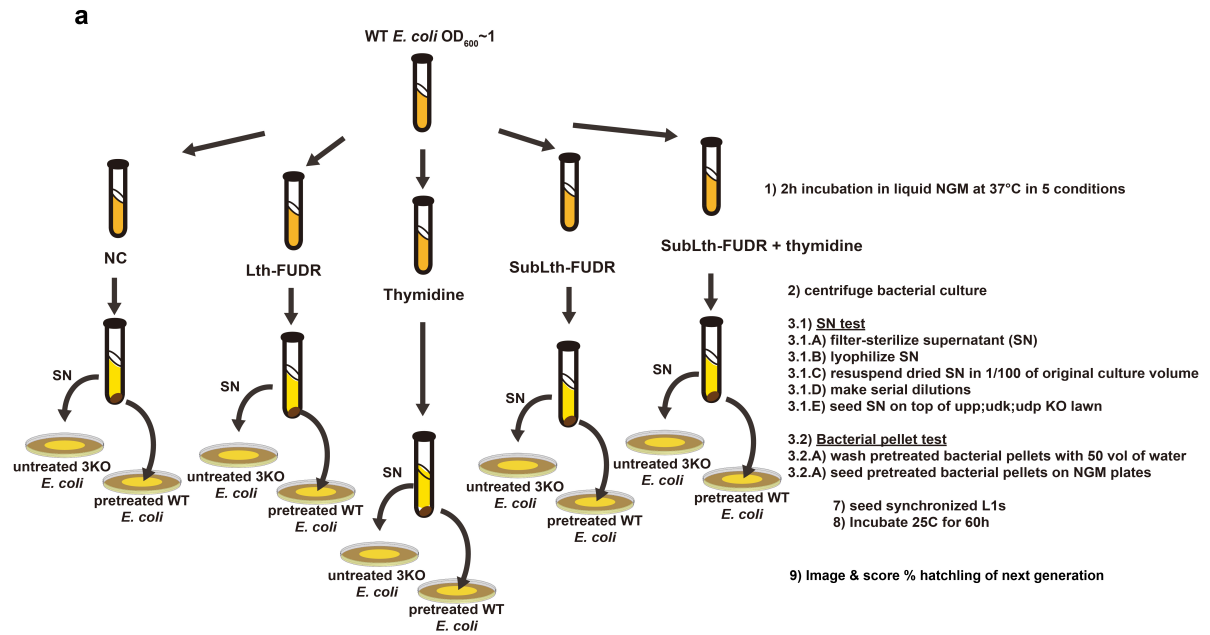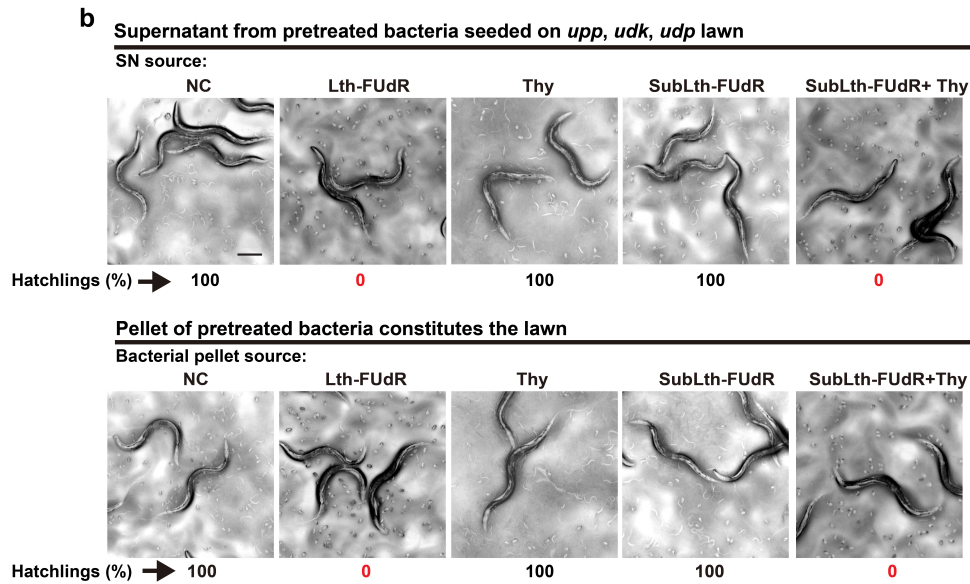

**Supplementary Figure 2. Pretreating *E. coli* with thymidine is sufficient to increase FUdR toxicity in *C. elegans*.**

(a) Workflow of “in tube” pretreatment of *E. coli* with mock, Lth-FUdR, or subLth-FUdR ± 5mg/mL thymidine and the follow up secreted versus intracellular (pellet) toxicity test. (b) Representative images of effect of pretreated supernatants and bacterial pellets on *C. elegans* progeny viability. Scale bars = 200µm. n=3.

### Supplemental figure 3

a (copy of a portion of Suppl. Fig. 1a to avoid moving back and forth between figures)

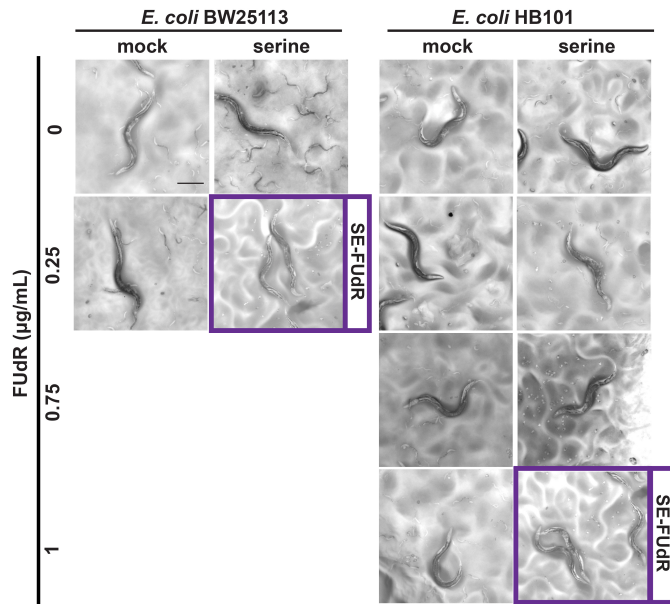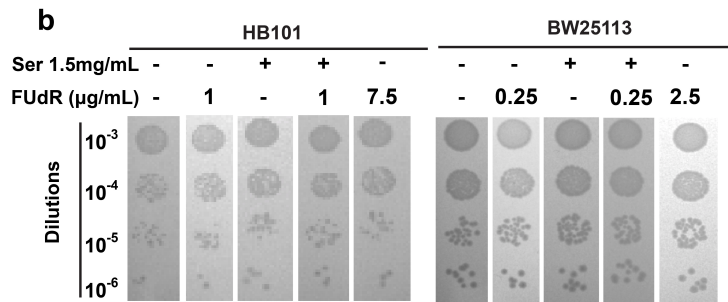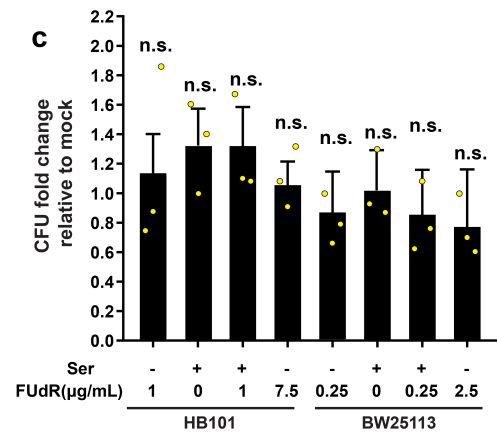

**Supplementary Figure 3. Lth-FUdR and SE-FUdR toxicity do not correlate with *E. coli* in plate growth or viability.**

Data acquisition and analysis described in Methods. Statistical significance for ratio CFU was assessed using one-tail ratio t-test. Data are presented as mean values  $\pm$  SEM. n= # independent biological replicates. Source data are provided as a Source Data file.

(a) Images from Supplementary Fig. 1a are reproduced here to avoid moving back and forth between supplementary figures. This is reproduced here to show what we define as SE-FUdR toxicity, which corresponds to 1 $\mu$ g/mL FUdR + 1.5mg/mL serine for worms cultured on BW25113 or its derivatives, and 7.5 $\mu$ g/mL FUdR + 1.5mg/mL serine for worms cultured on HB101 or its derivatives (i.e. EORB1). Scale bars = 200 $\mu$ m. n>10. (b) Representative images of viability of *E. coli* BW25113 and the HB101-derivative EORB1 after incubation for 48h in NGM plates supplemented with mock, subLth-FUdR, serine, subLth-FUdR plus serine, or Lth-FUdR as assessed by serial dilution for counting of colony forming units (CFU). (c) Quantification of CFU of treatments represented in panel b. Data were analyzed using ratio t-test. n=3.

## Supplemental Figure 4

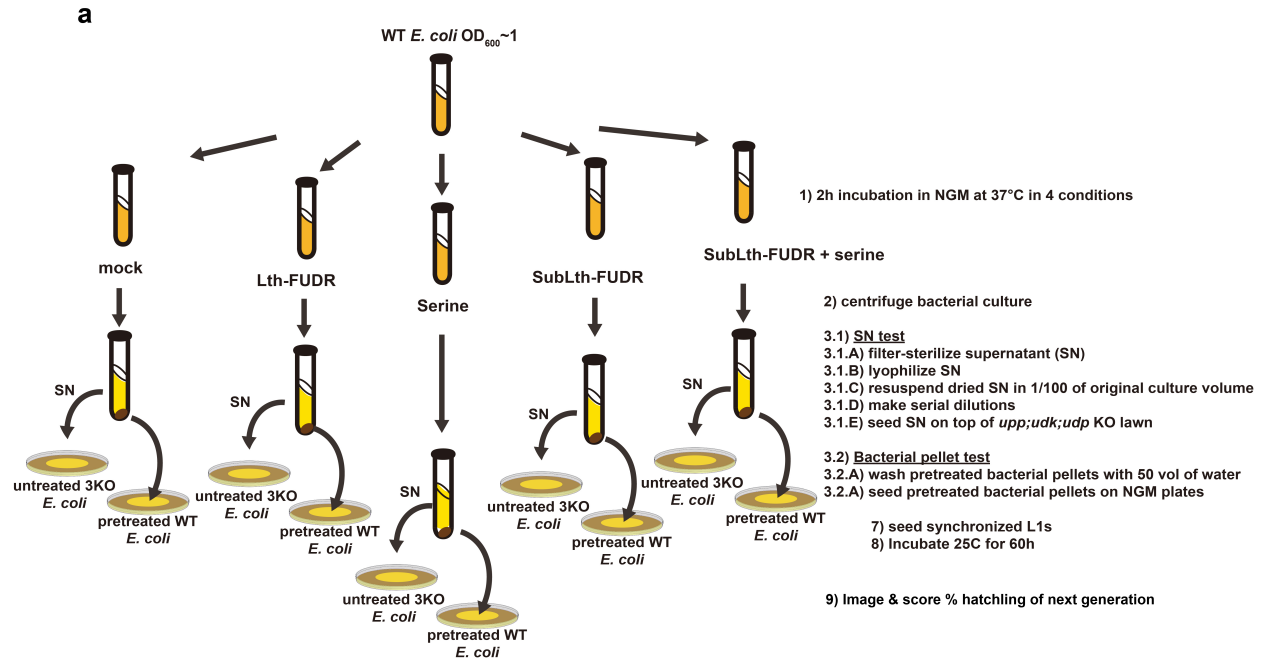

**b** Supernatant from pretreated bacteria seeded on *upp, udk, udp* 3KO lawn

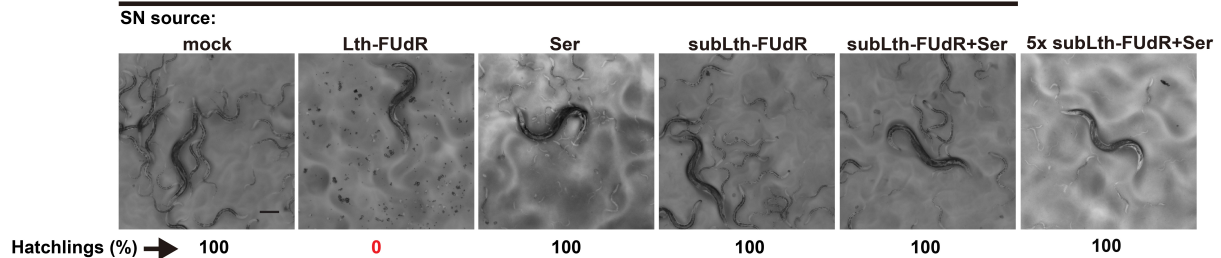

Pellet of pretreated bacteria constitutes the lawn

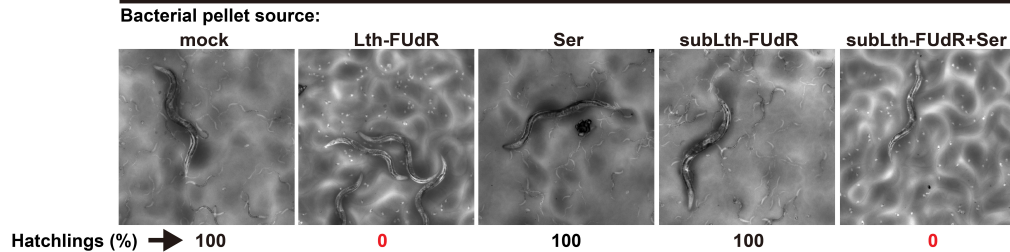



**Supplementary Figure 4. Treating Pretreating *E. coli* with serine is sufficient to increase FUdR toxicity in *C. elegans*.**

(a) Workflow of “in tube” pretreatment of *E. coli* with mock, Lth-FUdR, or subLth-FUdR ± serine and the follow up secreted versus intracellular (pellet) toxicity test. (b) Representative images of effect of pretreated supernatants and bacterial pellets on *C. elegans* progeny viability. Scale bars = 200µm. n=3.

## Supplemental Figure 5

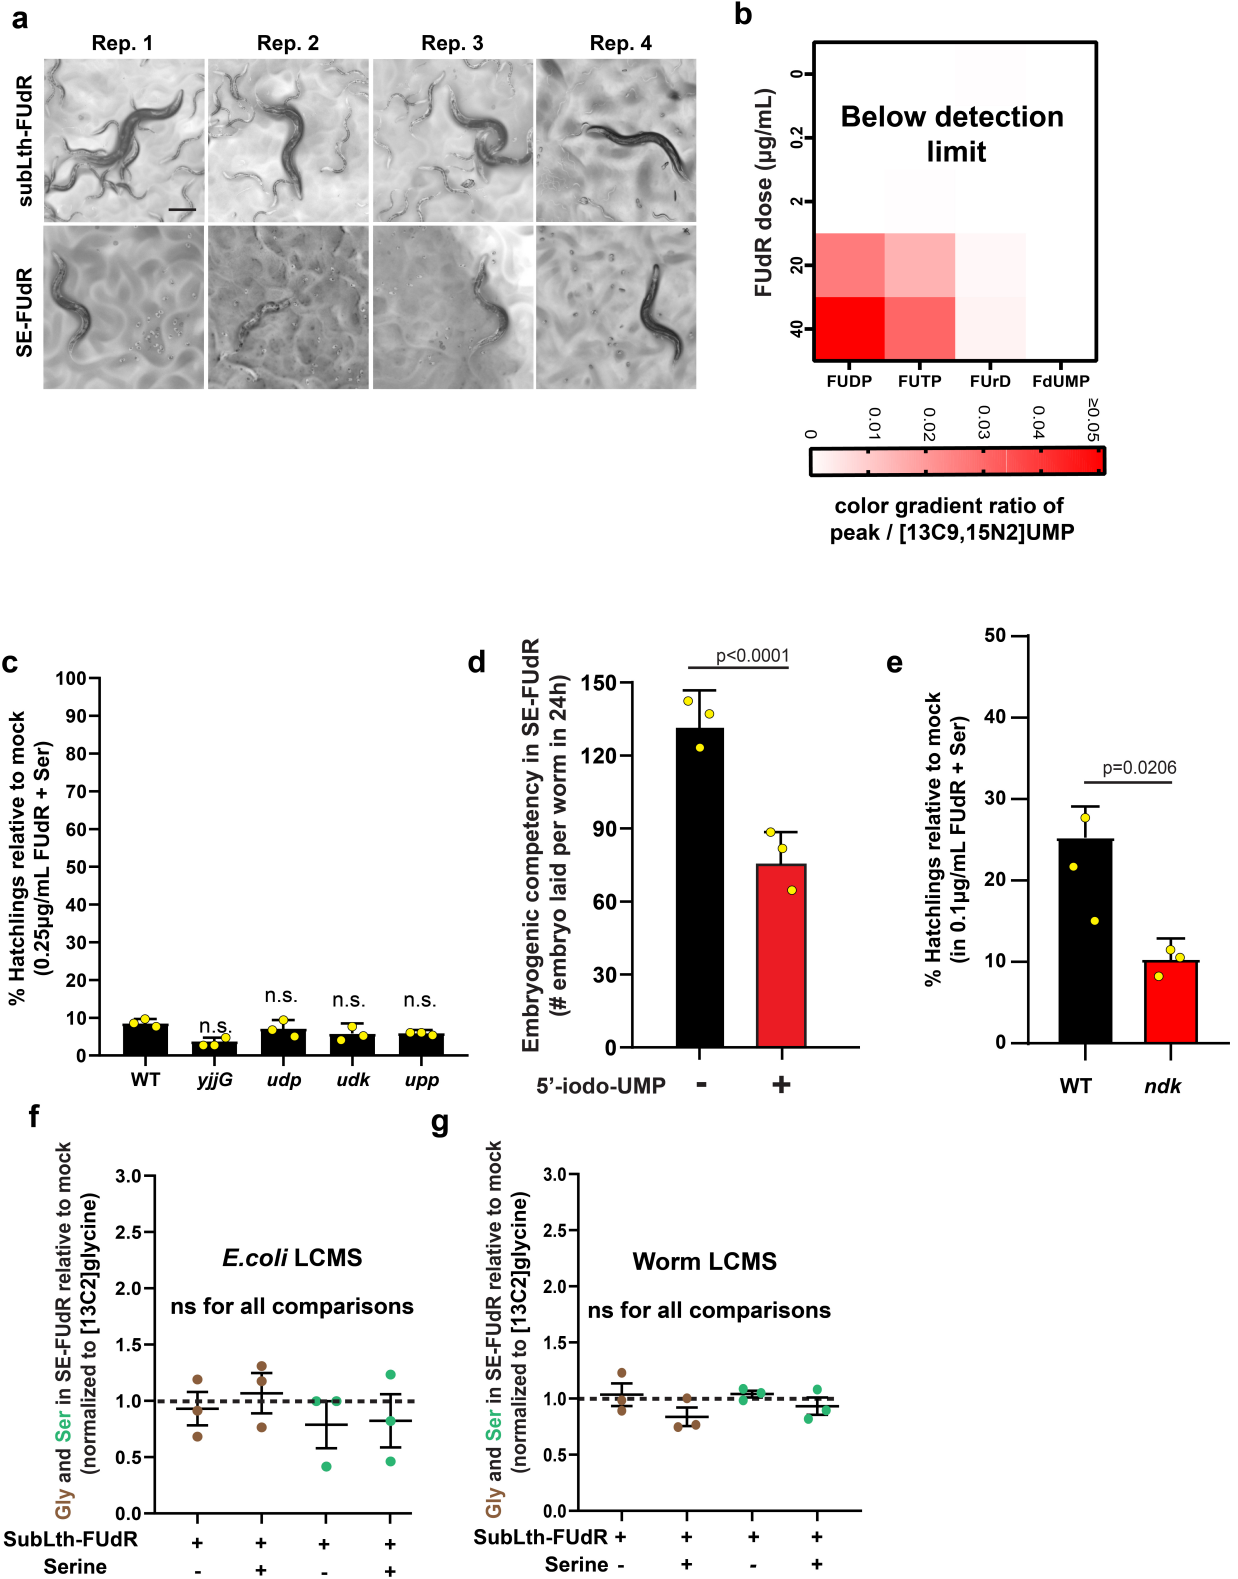

**Supplementary Figure 5. Serine does not promote FUdR-to-FUMP conversion or accumulates in *E. coli*.**

Throughout this figure: % hatchlings is estimated and data analyzed as described in Supplementary Fig. 1. Statistical significance was assessed via two-tailed unpaired nonparametric t-test for % hatchlings quantification. LCMS data was analyzed using one-tailed ratio t-test after ROUT outlier treatment. Data are presented as mean values  $\pm$  SEM, scale bars = 200 $\mu$ m. n= # independent biological replicates. Source data are provided as a Source Data file.

(a) Representative images of progeny viability observed in worms cultured on aliquots of *E. coli* pellets used for LCMS analyses presented in Fig. 2g,h, 4g, and Supplementary Fig. 5f,g. (b) Representation of the capacity of our LCMS set up to detect FUDP, FUTP, FUrD and FdUMP in extracts *E. coli* (BW25113) treated with increasing doses of FUdR (0-40 $\mu$ g/mL). FUDP and FUTP cannot be reliably detected in samples treated with less than 20 $\mu$ g/mL FUdR. FUrD and FdUMP cannot be reliably measured even in samples treated with 40 $\mu$ g/mL FUdR (>150 fold higher than the dose we use to characterize SE-FUdR toxicity) (c) Quantification of % hatchlings relative to mock of *C. elegans* cultured on WT (BW25113), *yjiG*, *udp*, *udk*, or *upp* KO lawns treated from L1 with mock or 0.25 $\mu$ g/mL FUdR plus serine. n=3. (d) Quantification of total number of embryos (all dead) laid in 24h per worm treated with SE-FUdR  $\pm$  the Tmk inhibitor 5'-iodo-UMP (100 $\mu$ M). n=3. Data were analyzed using two-tailed unpaired nonparametric T-test. (e) Quantification of % hatchlings relative to mock of *C. elegans* cultured on WT (BW25113) or *ndk* KO lawns treated from L1 with mock or 0.1 $\mu$ g/mL FUdR plus serine (lower dose of FUdR used to enable detection of toxicity enhancer). n=3. (f-g) LC-MS measurement of serine (green circles) and glycine (brown circles) integrated peaks normalized to internal standard [13C2] glycine in (f) *E. coli* (WT BW25113) and (g) *C. elegans* cultured on WT *E. coli* BW25113, and treated with subLth-FUdR + 1.5 mg/mL serine relative to mock, n=3. Data were analyzed using ratio t-test.

### Supplemental Figure 6

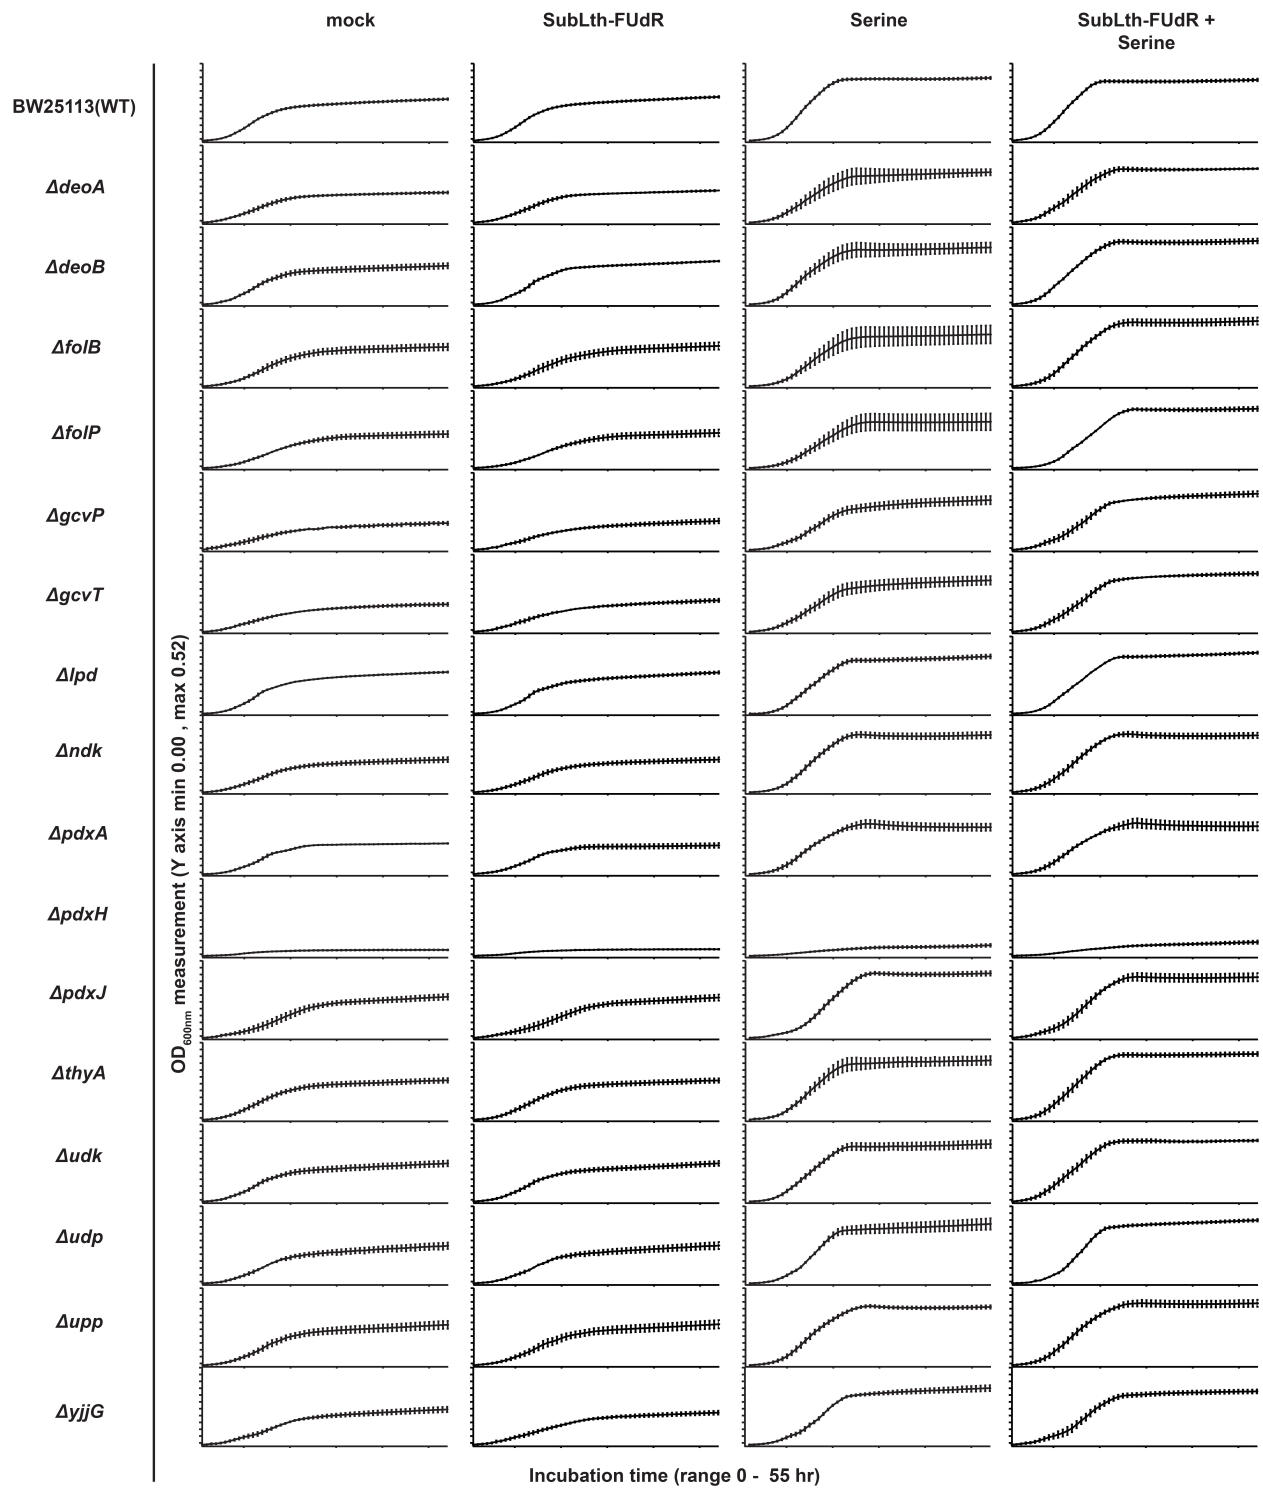

**Supplementary Figure 6. *E. coli*'s capacity to suppress SE-FUdR toxicity in *C. elegans* does not correlate with growth.**

Throughout this figure, data are presented as mean values  $\pm$  SEM. Curves depict 55 h continuous biomass measurement ( $OD_{600nm}$ ) of *E. coli* WT (BW25113) and KOs that alter SE-FUdR toxicity. Bacteria were cultured in complete liquid NGM containing mock, subLth-FUdR, serine, or subLth-FUdR plus serine. n=5. Source data are provided as a Source Data file.

Supplemental Figure 7

a

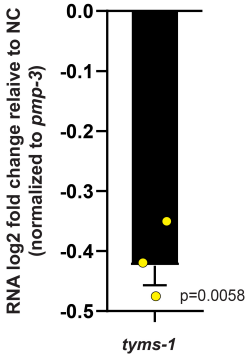

b

lawn: *upp;udk* (2KO)

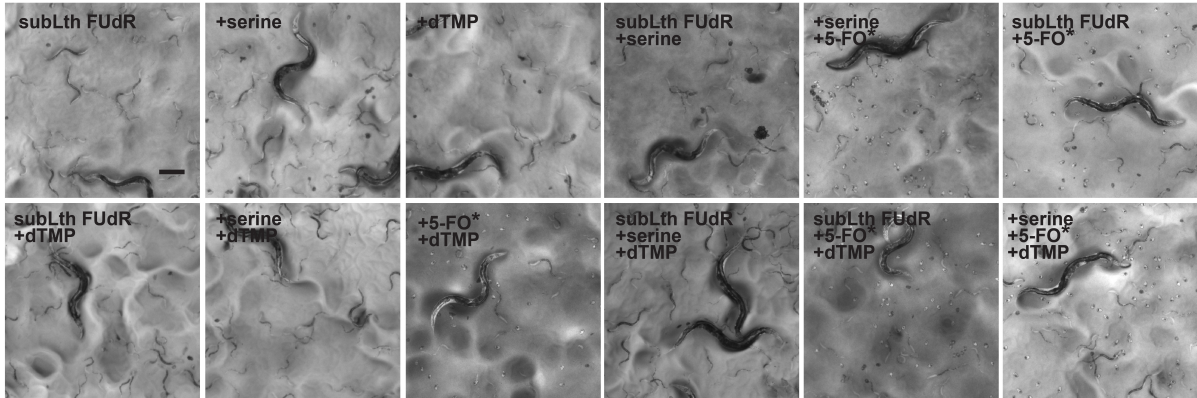

c

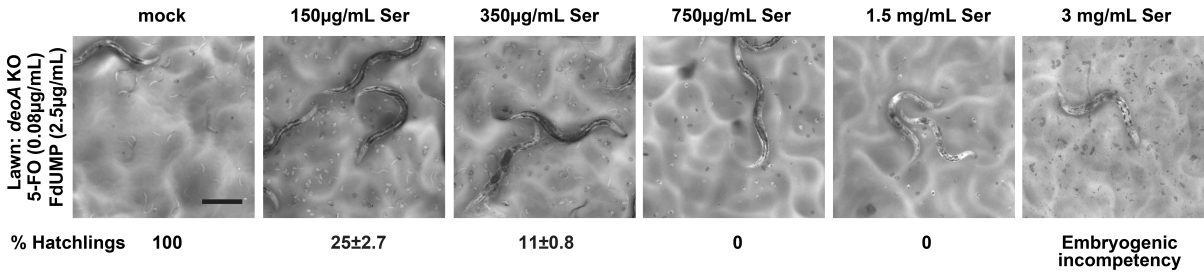

**Supplementary Figure 7.** Related to Fig. 4; Serine availability limits FUdR capacity to inhibit *E. coli* ThyA and hence to reduce dTMP pool in *C. elegans* diet.

Throughout this figure: data are presented as mean values  $\pm$  SEM, scale bars = 200 $\mu$ m. n= # independent biological replicates. Source data are provided as a Source Data file.

(a). qRT-PCR analysis of aliquots of *tym-1* RNAi and EORB1 EV worms used in Fig 4a. Fold change of *tym-1* expression was calculated as  $\Delta\Delta$ CT as described in Methods, using *pmp-3* as reference gene. Data were analyzed using one-tailed ratio t-test, and are presented as log<sub>2</sub> of fold change. n=3. (b) Representative images of all control conditions in Fig. 4j. n=3. (c) Representative images of effect of increasing doses of serine (0-3mg/mL) on *C. elegans* exposed to 0.08 $\mu$ g/mL 5-FO (to provide FUMP through a *upp,udk*-independent pathway) and 2.5 $\mu$ g/mL FdUMP (the main mediator of thymidine-less death) while cultured on *deoA* KO lawn (to avoid conversion of FdUMP into other fluoropyrimidines). n=3.

# Supplemental Figure 8

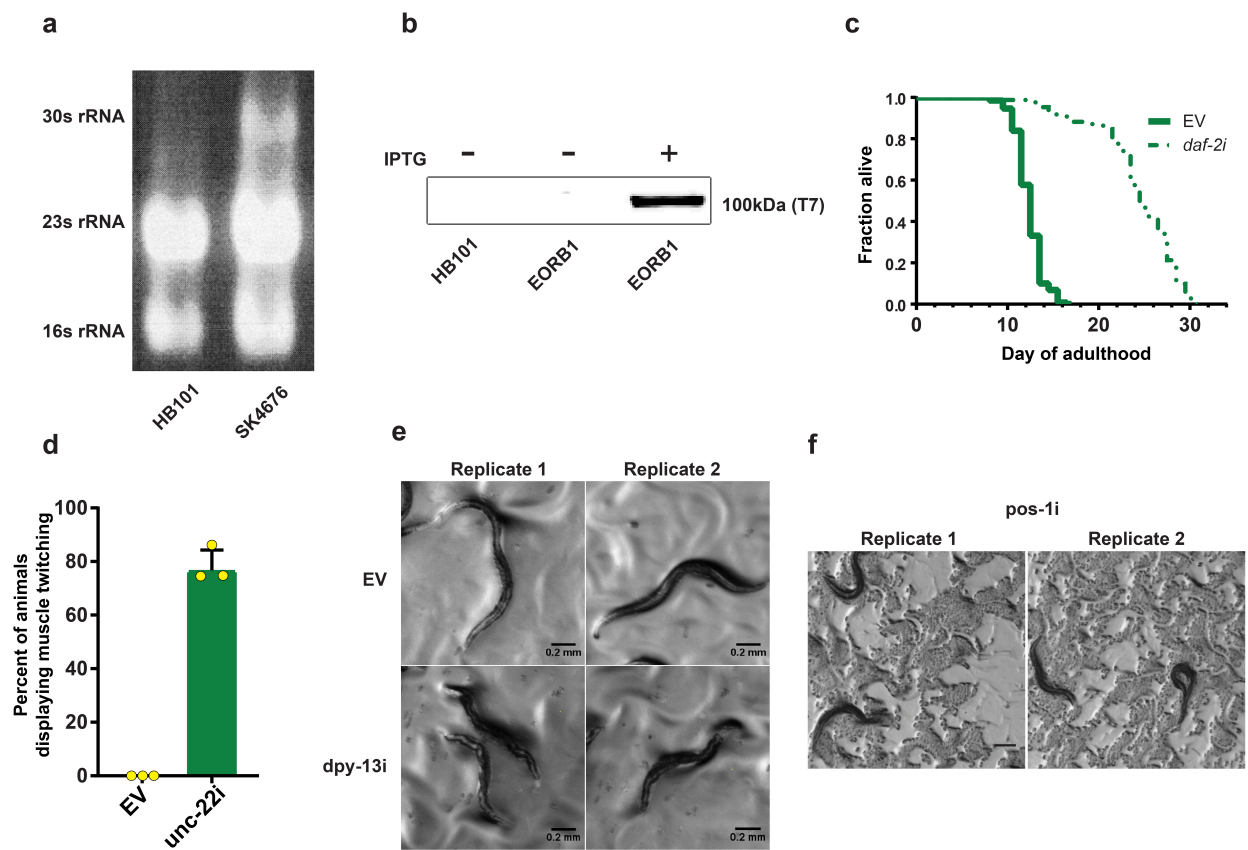



**Supplementary Figure 8. EORB1 is an RNAi-competent derivative of *E. coli* HB101.**

(a) HB101 *rnc*- derivative, but not HB101 parental, accumulates 30S rRNA precursor, n = 1. (b) IPTG-inducible T7 polymerase is expressed in EORB1 but not in the HB101 parental strain, n = 1. (c-f) EORB1 is competent for feeding RNAi: (c) RNAi against *daf-2* extends *C. elegans* lifespan ~2-fold, n = 2, (d) *unc-22* causes muscle twitching in >75% of animals. n=3, data is presented the as mean value  $\pm$  SEM. (e) *dpy-13* causes a dumpy phenotype in 100% of animals (2 representative experiments shown for control and RNAi), scale bars = 200 $\mu$ m, and (f) *pos-1* causes 100% sterility (2 representative experiments shown for RNAi) scale bars = 200 $\mu$ m. Source data are provided as a Source Data file.

# Supplemental Figure 9

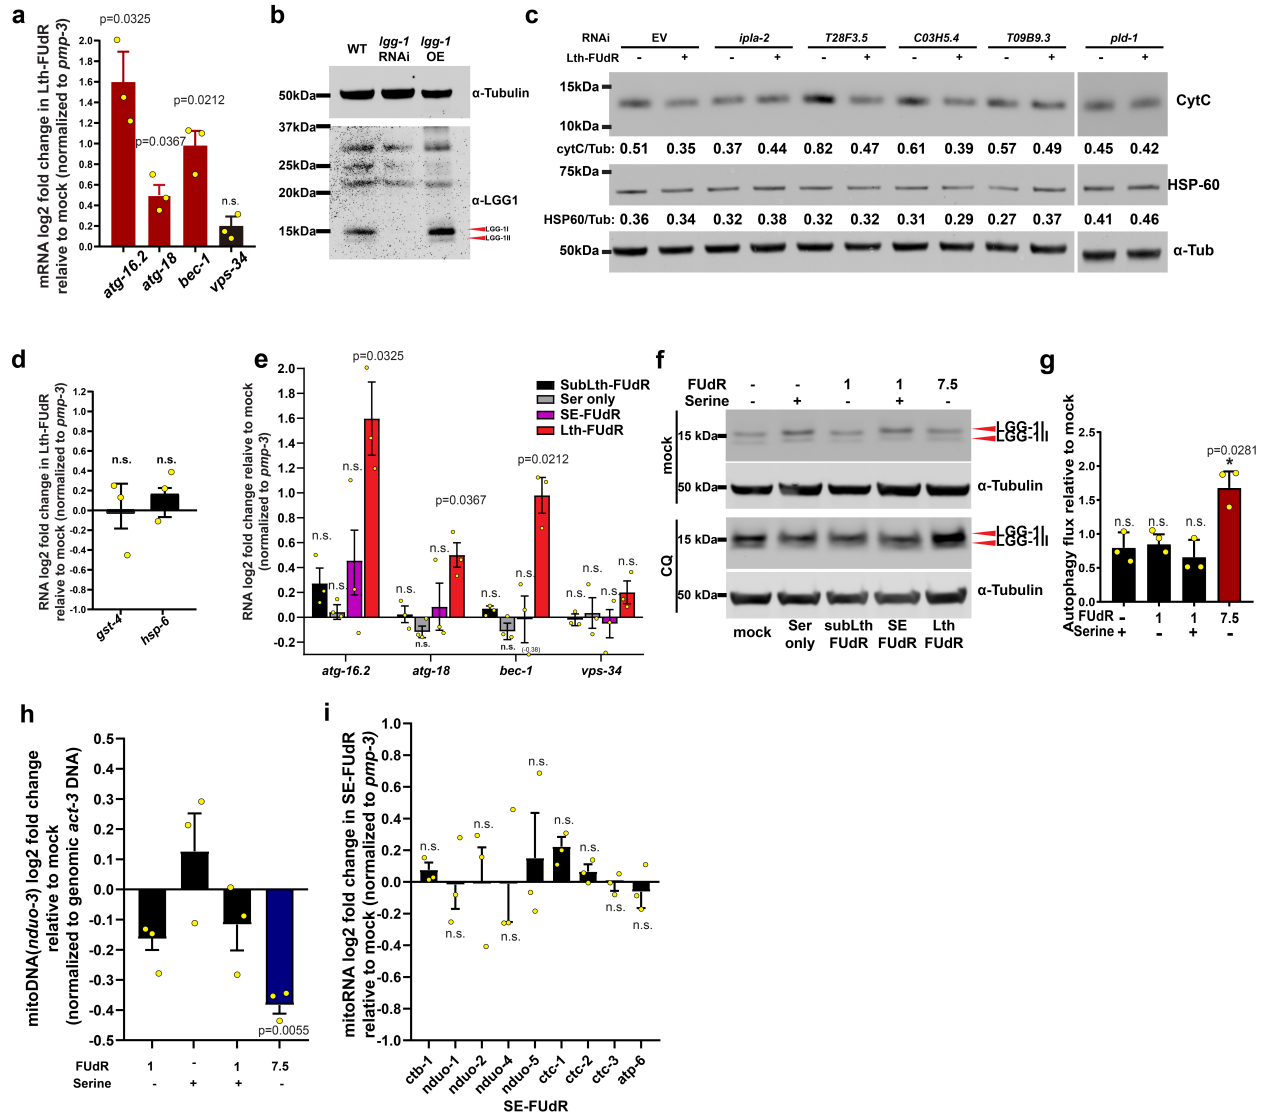

**Supplementary Figure 9.** Related to Fig. 7; SE-FUdR does not activate autophagy or alters mitochondrial function

Throughout this figure: statistical significance was assessed using one-tailed ratio t-test. Data are presented as mean values  $\pm$  SEM. n = # independent biological replicates. Source data are provided as a Source Data file.

(a) qRT-PCR analysis of autophagy genes in worms cultured on EORB1 lawn and treated with Lth-FUdR. Fold change was calculated as  $\Delta\Delta CT$  as described in Methods, using *pmp-3* as reference gene. Data are presented as log<sub>2</sub> of fold change. n=3 (b) The specificity of  $\alpha$ -LGG1 antibody was validated by western blotting of whole lysates of *C. elegans* fed RNAi against *lgg-1* and of a transgenic line overexpressing *lgg-1* (MAH215).  $\alpha$ -Tubulin (4A1) was used as loading reference. Red arrows point to LGG1I and LGG1II bands. n=1 (c) Representative western blotting analysis of endogenous cytochrome C (cytC) and of HSP-60 in worms treated with Lth-FUdR and fed EORB1 EV or RNAi targeting mitochondrial genes that suppress Lth-FUdR toxicity. Quantification of band intensity relative to  $\alpha$ -Tubulin is depicted. n=3. (d) qRT-PCR analysis of mito oxidative stress response (*gst-4*) and mitoUPR (*hsp-6*) in worms treated with Lth-FUdR relative to mock. Analysis and quantification as described in panel a. n=3. (e) qRT-PCR analysis of autophagy genes in worms cultured on EORB1 lawn and treated with subLth-FUdR, serine, SE-FUdR, or Lth-FUdR. Analysis and quantification as described in panel a. n=3. (f) Western blotting analysis of  $\alpha$ -LGG1 in worms cultured on EORB1 and treated with mock, serine, subLth-FUdR, SE-FUdR, and Lth-FUdR  $\pm$  20mM Chloroquine. (g) Quantification of LGG-1 relative to  $\alpha$ -Tubulin in treatments represented in panel f. Analysis and quantification as described in Fig. 5h n=3. Data analyzed using ratio t-test. (h) qPCR analysis of mitochondrial DNA content (*nduo-3*) relative to nuclear DNA (*act-3*) in subLth-FUdR, serine, SE-FUdR and Lth-FUdR relative to mock. Data presented as log<sub>2</sub> fold change and statistically analyzed using ratio t-test. n=3. (i) qRT-PCR analysis of the expression/stability of mitochondrially-encoded genes in worms treated with SE-FUdR. Quantification and analysis as described in panel a. n=3.

# Supplemental Figure 10

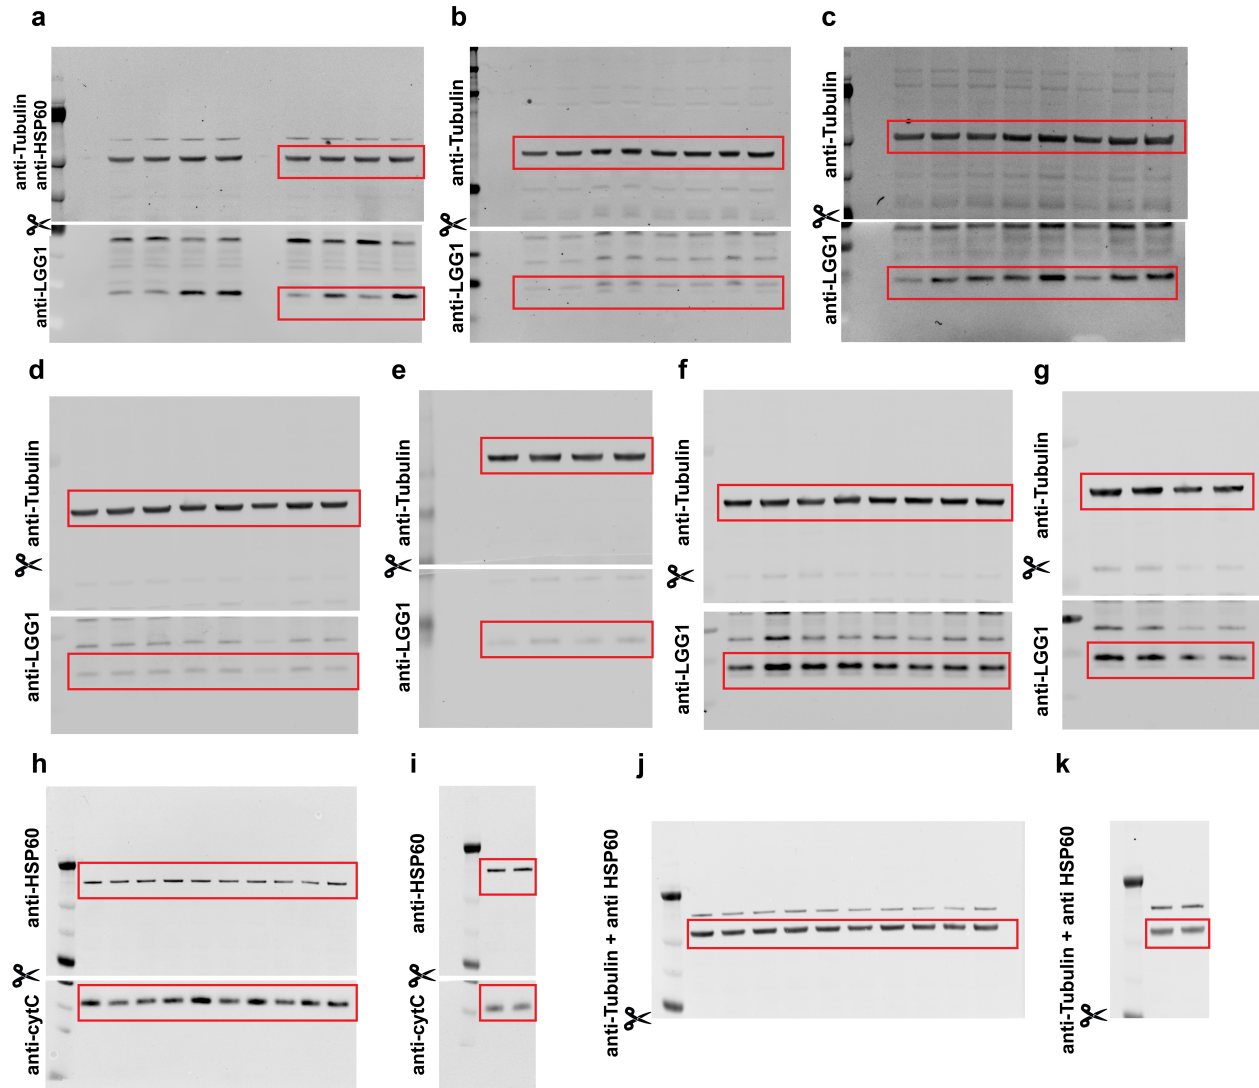

**Supplementary Figure 10.** Full western blots presented in main figures.

(a) Full blot of Fig. 5d. (b, c) Full blots of Fig. 5h (d-g) Full blots of Fig. 6c. (h-k) Full blots of Supplementary Figure 9c. Red boxes denote section cropped for display.

Supplementary Table 1

| <b>Gene name</b> | <b>B number</b> | <b>Gene name</b> | <b>B number</b> | <b>Gene name</b> | <b>B number</b> |
|------------------|-----------------|------------------|-----------------|------------------|-----------------|
| <i>alsA</i>      | b4087           | <i>mrcB</i>      | b0149           | <i>sdaA</i>      | b1814           |
| <i>alsB</i>      | b4088           | <i>mutM</i>      | b3635           | <i>sdaB</i>      | b2797           |
| <i>alsC</i>      | b4086           | <i>nadC</i>      | b0109           | <i>sdaC</i>      | b2796           |
| <i>aphA</i>      | b4055           | <i>ndk</i>       | b2518           | <i>serA</i>      | b2913           |
| <i>apt</i>       | b0469           | <i>nei</i>       | b0714           | <i>serB</i>      | b4388           |
| <i>cdd</i>       | b2143           | <i>nlpD</i>      | b2742           | <i>serC</i>      | b0907           |
| <i>cmk</i>       | b0910           | <i>nrdD</i>      | b4238           | <i>solA</i>      | b1059           |
| <i>codA</i>      | b0337           | <i>nth</i>       | b1633           | <i>sstT</i>      | b3089           |
| <i>codB</i>      | b0336           | <i>nupC</i>      | b2393           | <i>surE</i>      | b2744           |
| <i>cpdA</i>      | b3032           | <i>nupG</i>      | b2964           | <i>tdcC</i>      | b3116           |
| <i>cpdB</i>      | b4213           | <i>ompC</i>      | b2215           | <i>tdcG</i>      | b4471           |
| <i>crp</i>       | b3357           | <i>ompF</i>      | b0929           | <i>tdk</i>       | b1238           |
| <i>cyaA</i>      | b3806           | <i>ompN</i>      | b1377           | <i>thiD</i>      | b2103           |
| <i>cycA</i>      | b4208           | <i>pabA</i>      | b3360           | <i>thiE</i>      | b3993           |
| <i>cysE</i>      | b3607           | <i>pabB</i>      | b1812           | <i>thyA</i>      | b2827           |
| <i>damX</i>      | b3388           | <i>pabC</i>      | b1096           | <i>tnaA</i>      | b3708           |
| <i>dcd</i>       | b2065           | <i>pdxA</i>      | b0052           | <i>trpA</i>      | b1260           |
| <i>dedD</i>      | b2314           | <i>pdxH</i>      | b1638           | <i>trpB</i>      | b1261           |
| <i>deoA</i>      | b4382           | <i>pdxJ</i>      | b2564           | <i>trpD</i>      | b1263           |
| <i>deoB</i>      | b4383           | <i>pdxK</i>      | b2418           | <i>tsx</i>       | b0411           |
| <i>deoD</i>      | b4384           | <i>pdxY</i>      | b1636           | <i>udk</i>       | b2066           |
| <i>dksA</i>      | b0145           | <i>pepA</i>      | b4260           | <i>udp</i>       | b3831           |
| <i>dosP</i>      | b1489           | <i>pepB</i>      | b2523           | <i>ugpQ</i>      | b3449           |
| <i>entF</i>      | b0586           | <i>pepD</i>      | b0237           | <i>upp</i>       | b2498           |
| <i>fis</i>       | b3261           | <i>pepN</i>      | b0932           | <i>uraA</i>      | b2497           |
| <i>folB</i>      | b3058           | <i>phnN</i>      | b4094           | <i>ushA</i>      | b0480           |
| <i>folM</i>      | b1606           | <i>phoB</i>      | b0399           | <i>xapA</i>      | b2407           |
| <i>folP</i>      | b3177           | <i>phoE</i>      | b0241           | <i>xapB</i>      | b2406           |
| <i>fruR</i>      | b0080           | <i>pncB</i>      | b0931           | <i>yaaJ</i>      | b0007           |
| <i>gcvH</i>      | b2904           | <i>prkB</i>      | b3355           | <i>ybiV</i>      | b0822           |
| <i>gcvP</i>      | b2903           | <i>purD</i>      | b4005           | <i>ybjI</i>      | b0844           |
| <i>gcvT</i>      | b2905           | <i>purF</i>      | b2312           | <i>yccR</i>      | b0959           |
| <i>glpQ</i>      | b2239           | <i>purH</i>      | b4006           | <i>ycdG</i>      | b1006           |
| <i>glyA</i>      | b2551           | <i>purN</i>      | b2500           | <i>ydfG</i>      | b1539           |
| <i>glyS</i>      | b3559           | <i>purR</i>      | b1658           | <i>yeaV</i>      | b1801           |
| <i>gpt</i>       | b0238           | <i>purT</i>      | b1849           | <i>yeiA</i>      | b2147           |
| <i>gshB</i>      | b2947           | <i>purU</i>      | b1232           | <i>yeiT</i>      | b2146           |
| <i>hisG</i>      | b2019           | <i>pyrE</i>      | b3642           | <i>yfaO</i>      | b2251           |
| <i>hpt</i>       | b0125           | <i>pyrF</i>      | b1281           | <i>yfbR</i>      | b2291           |
| <i>ihfA</i>      | b1712           | <i>rbsA</i>      | b3749           | <i>ygfA</i>      | b2912           |
| <i>ihfB</i>      | b0912           | <i>rbsB</i>      | b3751           | <i>yggC</i>      | b2928           |
| <i>kbl</i>       | b3617           | <i>rbsC</i>      | b3750           | <i>ygjF</i>      | b3068           |
| <i>lpd</i>       | b0116           | <i>rbsD</i>      | b3748           | <i>yhfW</i>      | b3380           |
| <i>lpp</i>       | b1677           | <i>rbsK</i>      | b3752           | <i>yigB</i>      | b3812           |
| <i>ltaE</i>      | b0870           | <i>recX</i>      | b2698           | <i>yjff</i>      | b4231           |
| <i>mazG</i>      | b2781           | <i>rfe</i>       | b3784           | <i>yjjG</i>      | b4374           |
| <i>metF</i>      | b3941           | <i>rihA</i>      | b0651           | <i>ytfQ</i>      | b4227           |
| <i>metH</i>      | b4019           | <i>rihB</i>      | b2162           | <i>ytfR</i>      | b4485           |
| <i>mrcA</i>      | b3396           | <i>rihC</i>      | b0030           | <i>ytfT</i>      | b4230           |

**Supplementary Table 1. List of *E. coli* genes screened from the Keio *E. coli* knock-out library.**

List is comprised of genes found by iJO1366 model to be associated 1-2 steps away from homologs of mammalian fluoropyrimidine metabolic pathways. In total 147 loss of function mutants in the background *E. coli* strain BW25113 were screened.

Supplementary Table 2

| <b>Gene name</b> | <b>Keio clone</b> | <b>Biological process (EC)</b>                                 | <b>Verified</b> |
|------------------|-------------------|----------------------------------------------------------------|-----------------|
| <i>codA</i>      | b0337             | Deamination of cytosine to uracil (3.5.4.1)                    | NRT             |
| <i>crp</i>       | b3357             | cAMP receptor protein, regulates transcription                 | √               |
| <i>cysE</i>      | b3607             | Serine synthesis (2.3.1.30)                                    | NRT             |
| <i>dcd</i>       | b2065             | dUTP synthesis from dCTP (3.5.4.13)                            | NRT             |
| <i>deoA</i>      | b4382             | thymine/uracil synthesis from thymidine/deoxyuridine (2.4.2.4) | √               |
| <i>deoB</i>      | b4383             | PRPP synthesis (5.4.2.7)                                       | NRT             |
| <i>dkaA</i>      | b0145             | Regulates rRNA transcription                                   | NRT             |
| <i>dosP</i>      | b1489             | c-di-GMP hydrolysis (3.1.4.52)                                 | NRT             |
| <i>folB</i>      | b3058             | THF synthesis (4.1.2.25)                                       | √               |
| <i>folP</i>      | b3177             | THF synthesis (2.5.1.15)                                       | √               |
| <i>gcvP</i>      | b2903             | 10fTHF synthesis (1.4.4.2)                                     | √               |
| <i>gcvT</i>      | b2905             | 10fTHF synthesis (2.1.2.10)                                    | √               |
| <i>lpd</i>       | b0116             | 10fTHF synthesis (1.8.1.4)                                     | √               |
| <i>metF</i>      | b3941             | 5,10-methylene-THF metabolism (1.5.1.20)                       | X               |
| <i>nlpD</i>      | b2742             | Divisome associated factor                                     | NRT             |
| <i>pdxA</i>      | b0052             | Pyridoxal-5-phosphate synthesis                                | √               |
| <i>pdxH</i>      | b1638             | Pyridoxal-5-phosphate synthesis and salvage (1.4.3.5)          | √               |
| <i>pdxJ</i>      | b2564             | Pyridoxal-5-phosphate synthesis (2.6.99.2)                     | √               |
| <i>pepD</i>      | b0237             | Muropeptide degradation (3.4.13.18)                            | NRT             |
| <i>phoE</i>      | b0241             | Outer membrane phosphate transport                             | NRT             |
| <i>rbsK</i>      | b3752             | Ribose degradation (2.7.1.15)                                  | NRT             |
| <i>serC</i>      | b0907             | Serine synthesis (2.6.1.52)                                    | √               |
| <i>upp</i>       | b2498             | UMP salvage 2.4.2.9                                            | X               |
| <i>yjgG</i>      | b4374             | Pyrimidine nucleotidase (3.1.3.5)                              | X               |

| <b>Gene name</b> | <b>Keio clone</b> | <b>Biological process (EC)</b>             | <b>Verified</b> |
|------------------|-------------------|--------------------------------------------|-----------------|
| <i>ndk</i>       | b2518             | UTP/CTP synthesis (2.7.4.6)                | √               |
| <i>pabC</i>      | b1096             | PABA/tetrahydrofolate synthesis (4.1.3.38) | NRT             |
| <i>sdaB</i>      | b2797             | Serine degradation                         | NRT             |
| <i>udk</i>       | b2066             | UMP/CMP salvage (2.7.1.48)                 | X               |
| <i>udp</i>       | b3831             | Uracil salvage (2.4.2.3)                   | X               |



**Supplementary Table 2. Hits of Keio screen for mediators of SE-FUdR toxicity.**

Primary hits are presented as: blue = suppressor of toxicity; orange= enhancer of toxicity; and white= no different from WT control. Light blue or orange, represents phenotype observed in only 1-2 of 3 screen repeats. Hits belonging to overrepresented metabolic pathways were retested in 6cm NGM plates and quantitated for % hatchlings in sublethal FUdR (unless otherwise stated 0.25µg/mL) ± serine (1.5mg/mL), and the results are presented in main figures. Primary screen hits that were not retested in 6cm plates are depicted as NRT. Retested and verified hits (colored cells) and non-hits (white cells) are marked as “√”, and retested but not validated primary hits (phenotype did not repeat) are marked as “X”.

Supplementary Table 3

| <i>Symbol</i>         | Biological process                                                     | Lth-FUdR | SE-FUdR |
|-----------------------|------------------------------------------------------------------------|----------|---------|
| <b>vector control</b> |                                                                        |          |         |
| <b>F19G12.2</b>       | DNA damage response                                                    | NRT      | NRT     |
| <b>msh-6</b>          | mismatch repair of DNA (previously shown in Sengupta et al., 2013)     | ✓        | ✓       |
| <b>ung-1</b>          | base-excision repair of DNA                                            | ✓        | ✓       |
| <b>pus-1</b>          | Catalyzes pseudouridylation. Toxic covalent complex with fluorouracil. | ✓        | ✓       |
| <b>cdd-1</b>          | cytidine/deoxycytidine conversion to uridine/deoxyuridine              | NRT      | NRT     |
| <b>cdd-2</b>          | cytidine/deoxycytidine conversion to uridine/deoxyuridine              | NRT      | NRT     |
| <b>H24K24.3</b>       | alcohol dehydrogenase providing formate for pyrimidine synthesis       | NRT      | NRT     |
| <b>K02D7.1</b>        | purine nucleoside phosphorylase                                        | NRT      | NRT     |
| <b>tyms-1</b>         | thymidine synthesis                                                    | X        | X       |
| <b>aak-2</b>          | AMPK subunit                                                           | ✓        | ✓       |
| <b>atg-7</b>          | Autophagy (previously shown in Sengupta et al., 2013)                  | X        | X       |
| <b>bec-1</b>          | Autophagy (previously shown in Sengupta et al., 2013)                  | ✓        | ✓       |
| <b>lgg-1</b>          | Autophagy                                                              | ✓        | ✓       |
| <b>lgg-2</b>          | Autophagy                                                              | ✓        | ✓       |
| <b>vps-34</b>         | Autophagy                                                              | ✓        | ✓       |
| <b>T28F3.5</b>        | conversion of acetyl-CoA to malonyl-CoA (lipogenesis)                  | ✓        | ✓       |
| <b>ipla-2</b>         | similar to phospholipase A2                                            | ✓        | ✓       |
| <b>C03H5.4</b>        | similar to phospholipase A2                                            | ✓        | ✓       |
| <b>pld-1</b>          | similar to phospholipase D1                                            | ✓        | ✓       |
| <b>T09B9.3</b>        | glycerophosphodiesterase                                               | ✓        | ✓       |
| <b>aat-2</b>          | amino acid transport                                                   | NRT      | NRT     |
| <b>aat-3</b>          | amino acid transport                                                   | NRT      | NRT     |
| <b>C15B12.1</b>       | lysine catabolism                                                      | NRT      | NRT     |
| <b>cysl-1</b>         | cysteine synthesis                                                     | NRT      | NRT     |
| <b>cysl-4</b>         | cysteine synthesis                                                     | NRT      | NRT     |
| <b>got-2.2</b>        | aspartate catabolism                                                   | NRT      | NRT     |
| <b>pstk-1</b>         | seryl-tRNA phosphorylation                                             | NRT      | NRT     |
| <b>snf-6</b>          | amino acid transport                                                   | NRT      | NRT     |
| <b>fmo-2</b>          | Detox response                                                         | NRT      | NRT     |
| <b>daf-16</b>         | Detox transcription factor                                             | NRT      | NRT     |
| <b>C49F5.5</b>        | histone acetylation                                                    | NRT      | NRT     |
| <b>pcs-1</b>          | Detox response                                                         | NRT      | NRT     |
| <b>skn-1</b>          | Detox transcription factor                                             | NRT      | NRT     |
| <b>mpst-1</b>         | iron-sulfur complex formation                                          | NRT      | NRT     |
| <b>Y45F10D.4</b>      | iron homeostasis                                                       | NRT      | NRT     |
| <b>ctl-2</b>          | oxidative stress response                                              | NRT      | NRT     |
| <b>gst-3</b>          | oxidative stress response                                              | NRT      | NRT     |
| <b>gpx-8</b>          | oxidative stress response                                              | NRT      | NRT     |
| <b>gpx-5</b>          | oxidative stress response                                              | NRT      | NRT     |

**Supplementary Table 3. C. elegans suppressors and enhancers of Lth-FUdR and SE-FUdR toxicity**

Primary RNAi hits are presented as: blue = suppressor of toxicity; orange= enhancer of toxicity; and white= no different from WT control. Light blue or orange, represents phenotype observed in only 1-2 of 3 screen repeats. Hits belonging to overrepresented metabolic pathways were retested in 6cm NGM plates and quantitated for % hatchlings in sublethal FUdR (unless otherwise stated 1µg/mL) ± serine (1.5mg/mL), and the results are presented in main figures. Primary screen hits that were not retested in 6cm plates are depicted as NRT. Retested and verified hits (colored cells) and non-hits (white cells) are marked as “√”, and retested but not validated primary hits (phenotype did not repeat) are marked as “X”.

### **Supplementary Note 1**

Since the SE-FUdR mechanism of toxicity seems distinct from Lth-FUdR and TE-FUdR, fluororibonucleotides other than FUMP, specifically FUDP, FUTP, or fluorouridine (FUrd), could contribute to SE-FUdR toxicity. However, these fluororibonucleotides were below the detection limit of our LCMS of bacteria or worms treated with subLth-FUdR or SE-FUdR (Supplementary Fig. 5b).

This is not surprising, as previous studies<sup>1</sup> used a dose of fluoropyrimidine 50 fold higher (50 $\mu$ M) than the 0.25 $\mu$ g/mL (1 $\mu$ M) FUdR we use to study SE-FUdR toxicity.

SE-FUdR toxicity cannot be biochemically assessed at higher fluoropyrimidine doses because:

- 1) When using *E. coli* BW25113, doses of FUdR  $\geq 1\mu$ g/mL lead to 100% sterility. Hence, serine enhancement of toxicity cannot be assessed because further enhancement of sterility cannot be achieved; and
- 2) Although serine-enhanced toxicity can be observed at  $>10\mu$ g/mL FUdR in the form of developmental delay, it would not be informative to compare the metabolic profile of adults to young larvae.

Nevertheless, we used genetic and chemical inhibitor approaches to assess the potential contribution of other fluororibonucleotides, including FUDP, FUTP, FUrd, and FdUMP to SE-FUdR toxicity, and directly measured the levels of FUMP and 5-FU.

### **Supplementary Note 2**

A lower dose of subLth-FUdR was used in this experiment to enable detection of enhancement of toxicity when combining serine with *thyA*. The results also suggest that *C. elegans* is more dependent on *E. coli*'s supply of dTMP than its own *de novo* synthesis pathway, and that inhibition of *E. coli*'s TS is not detrimental to worms unless another concurrent insult is present (e.g. sublethal levels of FUMP toxicity).

### **Supplementary Note 3**

Set up of experiment aimed to test whether SE-FUdR toxicity can be rescued by dietary supplementation of dTMP.

This test requires a complex experimental set up because dTMP enhances FUdR-to-FUMP conversion, and hence, toxicity in *C. elegans*. So, if we simply add FUdR + serine + dTMP to w

wild-type *E. coli* lawn we will see dTMP enhances, instead of rescuing the toxicity. But this would be due to confounding factors.

Hence, to test whether SE-FUdR toxicity can be rescued by dietary supplementation of dTMP we need to prevent FUdR-to-FUMP conversion. This can be easily achieved by using a *upp,udk* double KO or a *upp,udk,udp* triple KO *E. coli* lawn. However, this brings another challenge. That is that we need sublethal levels of FUMP toxicity for SE-FUdR toxicity to work; hence, if using *E. coli* lawns unable to convert FUdR into FUMP, we need an alternative source of FUMP. The simplest would be to add FUMP to the system. However, FUMP is commercially available only as custom-made at the microgram level and it is not affordable. To overcome the need to provide FUMP in the absence of the FUdR-to-FUMP conversion pathway, we use 5'-fluorotic acid (5-FO) as the source of FUMP, as *E. coli* converts 5-FO into FUMP in a *upp;udk* independent-manner<sup>1</sup>.

Therefore, altogether the experimental set up to test whether SE-FUdR toxicity can be rescued by dietary supplementation of dTMP includes:

- 1) *upp;udk* double KO lawn to avoid dTMP + FUdR promoting FUMP toxicity;
- 2) 5'-fluorotic acid (5-FO) as the source of FUMP that is independent from Upp/Udp-Udk
- 3) SubLth-FUdR + serine to promote SE-FUdR; and
- 4) dTMP (1.5µg/mL) or mock to test whether dTMP supplementation rescues of SE-FUdR toxicity.

This complex experimental setup is necessary to test whether dietary thymidine rescues SE-FUdR because otherwise thymidine would simultaneously enhance Lth-FUdR toxicity (Fig. 1g-n), yielding confounding results.

### Supplementary References

1. Scott, T. A. *et al.* Host-Microbe Co-metabolism Dictates Cancer Drug Efficacy in *C. elegans*. *Cell* **169**, 442-456.e18 (2017).
