# Supplementary material for: Dietary serine-microbiota interaction enhances chemotherapeutic toxicity without altering drug conversion
Source: PubMed Central journal article supplement (PMC7244588; doi:10.1038/s41467-020-16220-w), 2020-05-22
Supplement: 41467_2020_16220_MOESM2_ESM.pdf [file 41467_2020_16220_MOESM2_ESM.pdf]

## Description of Additional Supplementary Files

File Name: Supplementary Data 1

Description: List of *C. elegans* genes tested in the EORB1 Lth-FUdR, and SE-FUdR RNAi screens. 387 gene knockdowns were tested in duplicate or triplicate in Lth-FUdR and SE-FUdR.
